# Supplementary material
Source: PubMed Central journal article supplement (PMC2658761)
Supplement: prion0204_0131SD1.pdf [file prion0204_0131SD1.pdf]

**Movie legend**

Time-lapse of RFP-Dcp1b labeled PBs (pseudo-colored green) showing restricted movement in the cytoplasm of a cell. Notice how two PBs fuse on the bottom left.
